# Supplementary material
Source: publisher figshare collection journal article supplement (https://springernature.figshare.com/ndownloader/files/7720528)
Supplement: Supplementary file 1 [file 7720528]

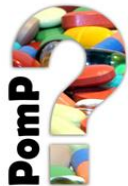

## Checkliste für Medikationsprüfungen

Bitte prüfen Sie für jedes Medikament des Patienten:

| Item                                                                                                                     | Medikament | 1 | 2 | 3 | 4 | 5 | 6 | 7 | 8 | 9 | 10 | 11 | 12 | Medikation<br>gesamt / Notizen |
|--------------------------------------------------------------------------------------------------------------------------|------------|---|---|---|---|---|---|---|---|---|----|----|----|--------------------------------|
| Indikation<br>Gibt es für das Medikament eine Indikation?                                                                |            |   |   |   |   |   |   |   |   |   |    |    |    |                                |
| Effektivität<br>Ist das Medikament hinsichtlich der Indikation effektiv?                                                 |            |   |   |   |   |   |   |   |   |   |    |    |    |                                |
| Dosierung<br>Ist die Dosierung für korrekt (Nierenfunktion!)?                                                            |            |   |   |   |   |   |   |   |   |   |    |    |    |                                |
| Applikation<br>Ist die Applikation korrekt und praktikabel?                                                              |            |   |   |   |   |   |   |   |   |   |    |    |    |                                |
| Wechselwirkungen<br>Gibt es Wechselwirkungen mit anderen Medikamenten?                                                   |            |   |   |   |   |   |   |   |   |   |    |    |    |                                |
| Begleiterkrankungen<br>Gibt es Wechselwirkungen / Kontraindikationen durch Begleiterkrankungen?                          |            |   |   |   |   |   |   |   |   |   |    |    |    |                                |
| Doppelverordnungen<br>Ist der Wirkstoff mehrfach verordnet?                                                              |            |   |   |   |   |   |   |   |   |   |    |    |    |                                |
| Priscus – Liste<br>Steht das Medikament auf der Priscus-Liste?                                                           |            |   |   |   |   |   |   |   |   |   |    |    |    |                                |
| QT-Zeit<br>Kann das Medikament eine Verlängerung der QT-Zeit bewirken?                                                   |            |   |   |   |   |   |   |   |   |   |    |    |    |                                |
| Sedierung<br>Hat das Medikament sedierende Effekte?                                                                      |            |   |   |   |   |   |   |   |   |   |    |    |    |                                |
| Anticholinergika<br>Hat das Medikament anticholinerge Effekte?                                                           |            |   |   |   |   |   |   |   |   |   |    |    |    |                                |
| Unterversorgung<br>Hat der Patient eine Erkrankung oder Beschwerden, die nicht ausreichend medikamentös therapiert sind? |            |   |   |   |   |   |   |   |   |   |    |    |    |                                |

\* Modifiziert nach dem Medication Appropriateness Index

## **PRISCUS – Liste alphabetisch**

|                    |                |                |               |
|--------------------|----------------|----------------|---------------|
| Acemetacin         | Dimenhydrinat  | Maprotilin     | Prasugrel     |
| Alprazolam         | Dimetinden     | Medazepam      | Prazepam      |
| Amitryptilin       | Diphenhydramin | Meloxicam      | Prazosin      |
| Baclofen           | Doxazosin      | Methyldopa     | Reserpin      |
| Bromazepam         | Doxepin        | Naftidrofuryl  | Solifenacin   |
| Brotizolam         | Doxylamin      | Nicergolin     | Sotalol       |
| Chinidin           | Ergotamin      | Nifedipin      | Temazepam     |
| Chloralhydrat      | Etoricoxib     | Nitrazepam     | Terazosin     |
| Chlordiazepoxid    | Flecainid      | Nitrofurantoin | Tetrazepam    |
| Chlorphenamin      | Flunitrazepam  | Olanzapin      | Thioridazin   |
| Clemastin          | Fluoxetin      | Oxazepam       | Ticlopidin    |
| Clobazepam         | Fluphenazin    | Oxybutynin     | Tolterodin    |
| Clomipramin        | Flurazepam     | Paraffin       | Trancylpromin |
| Clonidin           | Haloperidol    | Pentoxifyllin  | Triazolam     |
| Clozapin           | Hydroxyzin     | Perphenazin    | Trimipramin   |
| Diazepam           | Imipramin      | Pethidin       | Triprolidin   |
| Digoxin            | Indometacin    | Phenobarbital  | Zaleplon      |
| Dihydroergocryptin | Ketoprofen     | Phenylbutazon  | Zolpidem      |
| Dihydroergotoxin   | Levomeprazin   | Piracetam      | Zopiclon      |
| Dikaliumclorazepat | Lorazepam      | Piroxicam      |               |
