# Supplementary material
Source: publisher figshare collection journal article supplement (https://springernature.figshare.com/ndownloader/files/7720528)
Supplement: Supplementary file 2 [file 7720528]

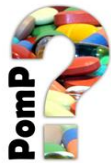

## Checklist for medication review

Please check for each drug of the patient:

| Item                                                                                            | Drug | 1 | 2 | 3 | 4 | 5 | 6 | 7 | 8 | 9 | 10 | 11 | 12 | Notes |
|-------------------------------------------------------------------------------------------------|------|---|---|---|---|---|---|---|---|---|----|----|----|-------|
| Indication<br>Is there an indication for the drug?                                              |      |   |   |   |   |   |   |   |   |   |    |    |    |       |
| Effectiveness<br>Is the drug effective for the indication?                                      |      |   |   |   |   |   |   |   |   |   |    |    |    |       |
| Dosage<br>Is the dosage correct (kidney function!) ?                                            |      |   |   |   |   |   |   |   |   |   |    |    |    |       |
| Application<br>Is the application correct and feasible?                                         |      |   |   |   |   |   |   |   |   |   |    |    |    |       |
| Interactions<br>Are there relevant interactions with other drugs?                               |      |   |   |   |   |   |   |   |   |   |    |    |    |       |
| Co-morbidities<br>Are there interactions or contraindications due to co-morbidities?            |      |   |   |   |   |   |   |   |   |   |    |    |    |       |
| Double prescriptions<br>Is the substance listed several times?                                  |      |   |   |   |   |   |   |   |   |   |    |    |    |       |
| PRISCUS List<br>Is the drug listed on the PRISCUS List?                                         |      |   |   |   |   |   |   |   |   |   |    |    |    |       |
| QT-Drugs<br>May the drug cause QT prolongation?                                                 |      |   |   |   |   |   |   |   |   |   |    |    |    |       |
| Sedation<br>Does the drug have sedative effects?                                                |      |   |   |   |   |   |   |   |   |   |    |    |    |       |
| Anticholinergic Drugs<br>Does the drug have anticholinergic effects?                            |      |   |   |   |   |   |   |   |   |   |    |    |    |       |
| Under-supply<br>Does the patient have a disease or symptoms which are not sufficiently treated? |      |   |   |   |   |   |   |   |   |   |    |    |    |       |

\* Modified according to the Medication Appropriateness Index

**PRISCUS List (alphabetic order)**

|                    |                |                |               |
|--------------------|----------------|----------------|---------------|
| Acemetacin         | Dimenhydrinat  | Maprotilin     | Prasugrel     |
| Alprazolam         | Dimetinden     | Medazepam      | Prazepam      |
| Amitryptilin       | Diphenhydramin | Meloxicam      | Prazosin      |
| Baclofen           | Doxazosin      | Methyldopa     | Reserpin      |
| Bromazepam         | Doxepin        | Naftidrofuryl  | Solifenacin   |
| Brotizolam         | Doxylamin      | Nicergolin     | Sotalol       |
| Chinidin           | Ergotamin      | Nifedipin      | Temazepam     |
| Chloralhydrat      | Etoricoxib     | Nitrazepam     | Terazosin     |
| Chlordiazepoxid    | Flecainid      | Nitrofurantoin | Tetrazepam    |
| Chlorphenamin      | Flunitrazepam  | Olanzapin      | Thioridazin   |
| Clemastin          | Fluoxetin      | Oxazepam       | Ticlopidin    |
| Clobazepam         | Fluphenazin    | Oxybutynin     | Tolterodin    |
| Clomipramin        | Flurazepam     | Paraffin       | Trancylpromin |
| Clonidin           | Haloperidol    | Pentoxifyllin  | Triazolam     |
| Clozapin           | Hydroxyzin     | Perphenazin    | Trimipramin   |
| Diazepam           | Imipramin      | Pethidin       | Triprolidin   |
| Digoxin            | Indometacin    | Phenobarbital  | Zaleplon      |
| Dihydroergocryptin | Ketoprofen     | Phenylbutazon  | Zolpidem      |
| Dihydroergotoxin   | Levomeprazin   | Piracetam      | Zopiclon      |
| Dikaliumclorazepat | Lorazepam      | Piroxicam      |               |
